# Supplementary material for: Constituents of Coliform Species Contained in the Permeate of Microfiltration Membranes in Wastewater Treatment
Source: MDPI journal article supplement (doi:10.3390/w16091269), 2024-04-28
Supplement: s1 [file s1]

# Constituents of Coliform Species Contained in the Permeate of Microfiltration Membranes in Wastewater Treatment

Shuai Zhou, Taro Urase and Saki Goto

## Supplementary Information

**Table S1.** The results of identifications, microscopic observations, origins (RUN no. and the elapsed time) of the isolates obtained from the permeate of membranes.

| Genera          | 16S rRNA sequencing                               |                  | Microscopic observation |               | Origin of the isolate |       |       |                  |
|-----------------|---------------------------------------------------|------------------|-------------------------|---------------|-----------------------|-------|-------|------------------|
|                 | Species with high similarity (number of isolates) | Accession number | Size (μm)               | Gram staining | Membrane pore sizes   |       |       | Experimental RUN |
|                 |                                                   |                  |                         |               | 0.2μm                 | 0.4μm | 0.8μm |                  |
| Serratia        | S. oryzae(3)                                      |                  |                         |               |                       |       |       |                  |
|                 | NB-1                                              | PP396550         | 1.28 x 0.63             | N             |                       |       | 3h    | 1                |
|                 | NB-2                                              | PP396551         | 1.54 x 0.82             | N             |                       |       | 5h    | 1                |
|                 | ND-3                                              | PP396568         | 1.02 x 0.66             | N             |                       |       | 5h    | 2                |
|                 | S. marcescens(2)                                  |                  |                         |               |                       |       |       |                  |
|                 | NH-17                                             | PP396613         | 0.95 x 0.75             | N             |                       |       | 72h   | 4                |
|                 | NJ-01                                             | PP396626         | 1.00 x 0.77             |               |                       |       | 1h    | 5                |
| Enterobacter    | E. tabaci(8)                                      |                  |                         |               |                       |       |       |                  |
|                 | ND-1                                              | PP396566         | 0.76 x 0.58             | N             |                       |       | 1h    | 2                |
|                 | NF-1                                              | PP396582         | 0.96 x 0.63             | N             |                       |       | 1h    | 3                |
|                 | NH-2                                              | PP396607         | 1.03 x 0.79             | N             |                       |       | 3h    | 4                |
|                 | NH-4                                              | PP396609         | 0.67 x 0.49             | N             |                       |       | 5h    | 4                |
|                 | NH-12                                             | PP396611         | 0.89 x 0.62             | N             |                       |       | 24h   | 4                |
|                 | NH-20                                             | PP396614         | 0.81 x 0.63             | N             |                       |       | 96h   | 4                |
|                 | NJ-3                                              | PP396627         | 0.94 x 0.68             | N             |                       | 3h    |       | 5                |
|                 | NJ-17                                             | PP396632         | 1.02 x 0.72             | N             |                       |       | 24h   | 5                |
|                 | E. ludwigii(7)                                    |                  |                         |               |                       |       |       |                  |
|                 | ND-4                                              | PP396569         | 1.04 x 0.78             |               |                       |       | 24h   | 2                |
|                 | NF-10                                             | PP396583         | 0.94 x 0.75             | N             |                       | 120h  |       | 3                |
|                 | NF-11                                             | PP396584         | 0.86 x 0.68             | N             |                       | 120h  |       | 3                |
|                 | NF-12                                             | PP396585         | 1.09 x 0.84             | N             |                       | 120h  |       | 3                |
|                 | NF-13                                             | PP396586         | 1.10 x 0.90             | N             |                       | 120h  |       | 3                |
|                 | NF-14                                             | PP396587         | 0.92 x 0.74             | N             |                       | 120h  |       | 3                |
|                 | NF-15                                             | PP396588         | 1.08 x 0.76             | N             |                       | 120h  |       | 3                |
|                 | NF-16                                             | PP396589         | 1.01 x 0.59             | N             |                       | 120h  |       | 3                |
|                 | E. kobei(2)                                       |                  |                         |               |                       |       |       |                  |
|                 | NH-1                                              | PP396606         | 0.91 x 0.70             | N             |                       |       | 1h    | 4                |
|                 | NJ-16                                             | PP396631         | 1.14 x 0.84             | N             |                       |       | 24h   | 5                |
|                 | Kluyvera                                          | K. ascorbata(1)  |                         |               |                       |       |       |                  |
| ND-2            |                                                   | PP396567         | 1.00 x 0.71             | N             |                       |       | 1h    | 2                |
| K. georgiana(1) |                                                   |                  |                         |               |                       |       |       |                  |

|                    |                               |          |             |      |      |   |
|--------------------|-------------------------------|----------|-------------|------|------|---|
|                    | NF-43                         | PP396599 | 0.83 x 0.69 | N    | 168h | 3 |
| <i>Klebsiella</i>  | <i>K. pneumoniae</i> (7)      |          |             |      |      |   |
|                    | NF-17                         | PP396590 | 1.33 x 1.04 | N    | 120h | 3 |
|                    | NF-31                         | PP396591 | 1.01 x 0.71 | N    | 120h | 3 |
|                    | NF-32                         | PP396592 | 0.93 x 0.64 | N    | 120h | 3 |
|                    | NH-23                         | PP396616 | 0.90 x 0.69 | N    | 120h | 4 |
|                    | NH-24                         | PP396617 | 1.22 x 0.78 | N    | 120h | 4 |
|                    | NH-27                         | PP396619 | 0.98 x 0.74 | N    | 120h | 4 |
|                    | NJ-21                         | PP396634 | 1.00 x 0.73 | N    | 120h | 5 |
|                    | NJ-22                         | PP396635 | 0.95 x 0.69 | N    | 120h | 5 |
|                    | <i>K. pneumoniae</i> (1)      |          |             |      |      |   |
|                    | NF-33                         | PP396593 | 1.00 x 0.82 | N    | 120h | 3 |
|                    | <i>K. quasipneumoniae</i> (5) |          |             |      |      |   |
|                    | NF-38                         | PP396595 | 0.94 x 0.73 | N    | 168h | 3 |
|                    | NF-39                         | PP396596 | 0.94 x 0.76 | N    | 168h | 3 |
|                    | NF-40                         | PP396597 | 0.92 x 0.73 | N    | 168h | 3 |
|                    | NF-41                         | PP396598 | 0.90 x 0.70 | N    | 168h | 3 |
|                    | NH-25                         | PP396618 | 1.20 x 0.89 | N    | 120h | 4 |
| <i>Citrobacter</i> | <i>C. freundii</i> (6)        |          |             |      |      |   |
|                    | NH-3                          | PP396608 | 0.92 x 0.63 | N    | 5h   | 4 |
|                    | NH-11                         | PP396610 | 1.12 x 0.80 | N    | 24h  | 4 |
|                    | NH-16                         | PP396612 | 1.00 x 0.75 | N    | 72h  | 4 |
|                    | NJ-7                          | PP396628 | 0.97 x 0.78 | N    | 3h   | 5 |
|                    | NJ-12                         | PP396629 | 1.01 x 0.81 | N    | 5h   | 5 |
|                    | NJ-13                         | PP396630 | 1.03 x 0.75 | N    | 5h   | 5 |
| <i>Yokenella</i>   | <i>Y. regensburgei</i> (1)    |          |             |      |      |   |
|                    | NJ-20                         | PP396633 | 1.02 x 0.80 | N    | 48h  | 5 |
| Other              | <i>Pseudomonas</i> spp.       |          |             |      |      |   |
|                    | NF-37                         | PP396594 |             | 120h |      | 3 |
|                    | NH-22                         | PP396615 |             |      | 96h  | 4 |

**Table S2.** Bacterial species identified in the activated sludge.

| Genera                           | 16S rRNA sequencing                               |      | Accession number | Origin of the isolate (Experimental RUN) |
|----------------------------------|---------------------------------------------------|------|------------------|------------------------------------------|
|                                  | Species with high similarity (number of isolates) |      |                  |                                          |
| <i>Klebsiella</i>                | <i>K. pneumoniae</i> (3)                          |      |                  |                                          |
|                                  |                                                   | NA01 | PP396540         | 1                                        |
|                                  |                                                   | NA02 | PP396541         | 1                                        |
|                                  |                                                   | NC22 | PP396563         | 2                                        |
|                                  | <i>K. quasivariicola</i> (2)                      |      |                  |                                          |
|                                  |                                                   | NA11 | PP396544         | 1                                        |
|                                  |                                                   | NG04 | PP396602         | 4                                        |
|                                  | <i>K. quasipneumoniae</i> (1)                     |      |                  |                                          |
|                                  |                                                   | NG09 | PP396604         | 4                                        |
| <i>Escherichia/Shigella</i> spp. | (9)                                               |      |                  |                                          |
|                                  |                                                   | NA06 | PP396542         | 1                                        |
|                                  |                                                   | NA14 | PP396546         | 1                                        |

|                     |                                 |          |   |
|---------------------|---------------------------------|----------|---|
|                     | NA15                            | PP396547 | 1 |
|                     | NA16                            | PP396548 | 1 |
|                     | NA17                            | PP396549 | 1 |
|                     | NC05                            | PP396552 | 2 |
|                     | NC17                            | PP396559 | 2 |
|                     | NE03                            | PP396570 | 3 |
|                     | NE11                            | PP396576 | 3 |
| <i>Enterobacter</i> | <i>E. cancerogenus</i> (10)     |          |   |
|                     | NA10                            | PP396543 | 1 |
|                     | NC07                            | PP396553 | 2 |
|                     | NC08                            | PP396554 | 2 |
|                     | NC09                            | PP396555 | 2 |
|                     | NC12                            | PP396558 | 2 |
|                     | NC19                            | PP396560 | 2 |
|                     | NC21                            | PP396562 | 2 |
|                     | NC23                            | PP396564 | 2 |
|                     | NC24                            | PP396565 | 2 |
|                     | NE07                            | PP396574 | 3 |
|                     | <i>E. asburiae</i> (1)          |          |   |
|                     | NC20                            | PP396561 | 2 |
|                     | <i>E. quasiroggenkampii</i> (1) |          |   |
|                     | NE05                            | PP396572 | 3 |
|                     | <i>E. ludwigii</i> (1)          |          |   |
|                     | NE06                            | PP396573 | 3 |
|                     | <i>E. kobei</i> (2)             |          |   |
|                     | NE08                            | PP396575 | 3 |
|                     | NI03                            | PP396620 | 5 |
| <i>Citrobacter</i>  | <i>C. amalonaticus</i> (1)      |          |   |
|                     | NA12                            | PP396545 | 1 |
|                     | <i>C. europaeus</i> (2)         |          |   |
|                     | NE04                            | PP396571 | 3 |
|                     | NG02                            | PP396600 | 4 |
|                     | <i>C. freundii</i> (6)          |          |   |
|                     | NE12                            | PP396577 | 3 |
|                     | NG08                            | PP396603 | 4 |
|                     | NG10                            | PP396605 | 4 |
|                     | NI04                            | PP396621 | 5 |
|                     | NI05                            | PP396622 | 5 |
|                     | NI10                            | PP396625 | 5 |
|                     | <i>C. arsenatis</i> (2)         |          |   |
|                     | NE13                            | PP396578 | 3 |
|                     | NE14                            | PP396579 | 3 |
|                     | <i>C. braakii</i> (1)           |          |   |
|                     | NE15                            | PP396580 | 3 |
|                     | <i>C. youngae</i> (1)           |          |   |
|                     | NI09                            | PP396624 | 5 |
| <i>Serratia</i>     | <i>S. marcescens</i> (1)        |          |   |
|                     | NC10                            | PP396556 | 2 |
|                     | <i>S. oryzae</i> (1)            |          |   |
|                     | NE18                            | PP396581 | 3 |
| <i>Aeromonas</i>    | <i>A. caviae</i> (2)            |          |   |
|                     | NC11                            | PP396557 | 2 |
|                     | NI08                            | PP396623 | 5 |
| <i>Raoultella</i>   | <i>R. ornithinolytica</i>       |          |   |
|                     | NG03                            | PP396601 | 4 |
